# Supplementary material for: Evaluating Groundwater Potential in Arid Regions through Pumping Tests: Insights from the Nubian Sandstone Aquifer, Western Desert of Egypt
Source: Research Square preprint supplement (doi:10.21203/rs.3.rs-7504396/v1), 2025-10-27
Supplement: Supplementary file 1 [file 259634415fddcf220a1b6c5a.docx]

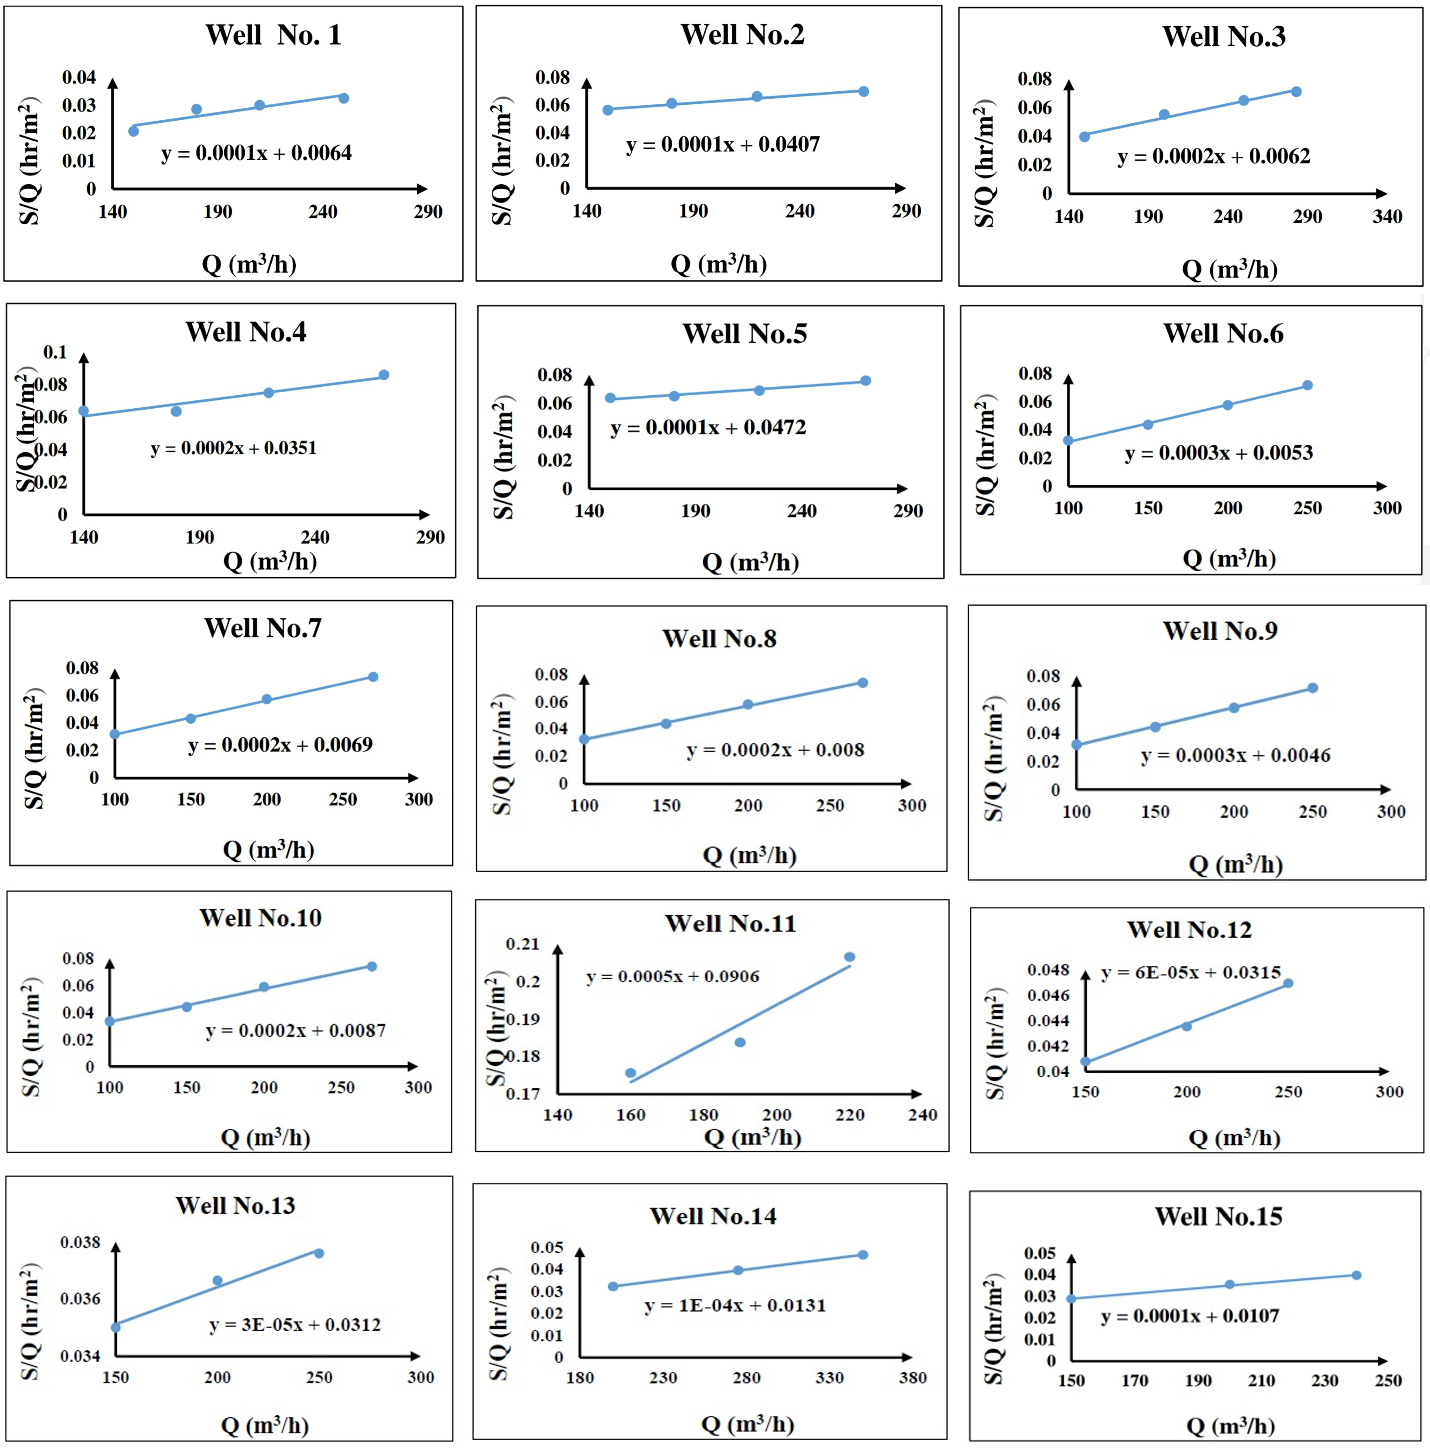


**Fig. 1S.** The step-drawdown test at the studied wells 1-15


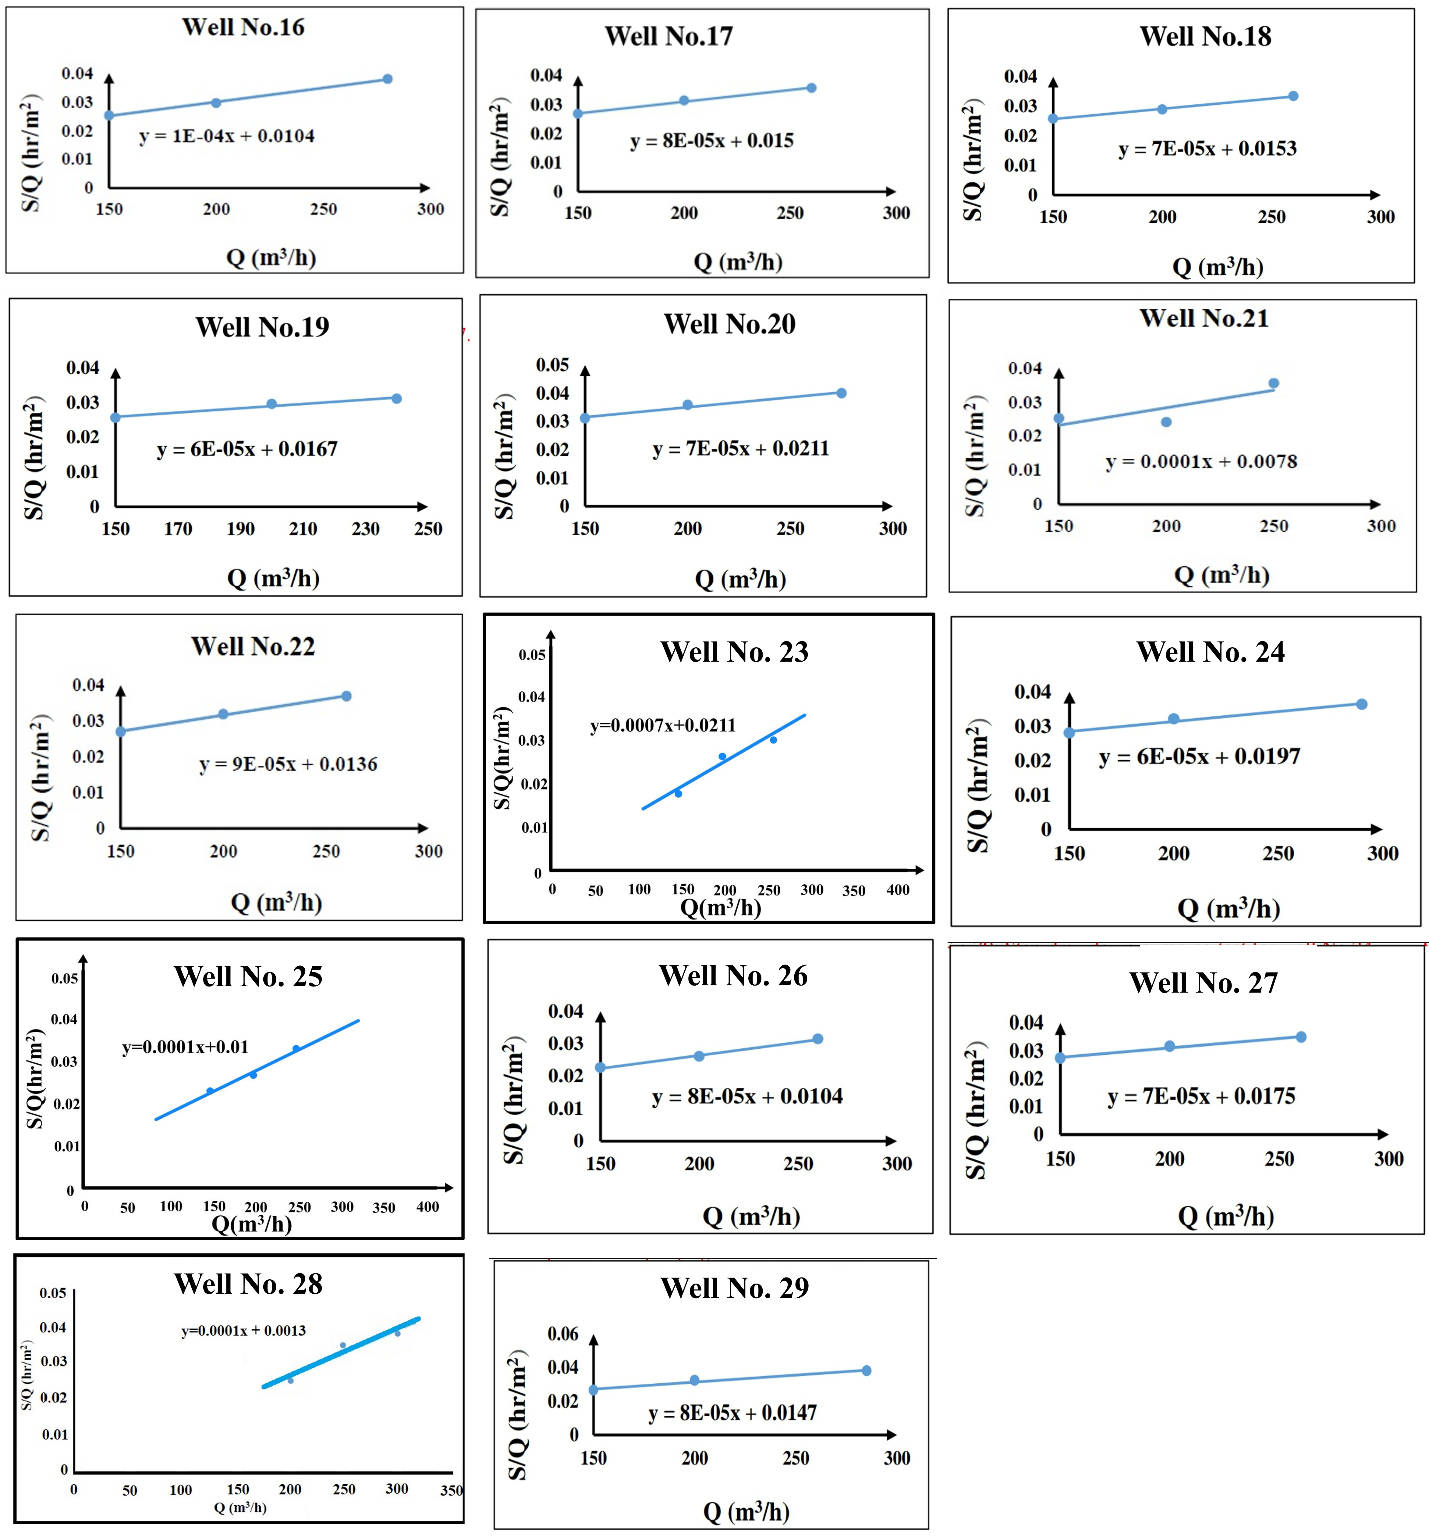


**Fig. 1S.** Continued: The step-drawdown test at the studied wells 16-29

**
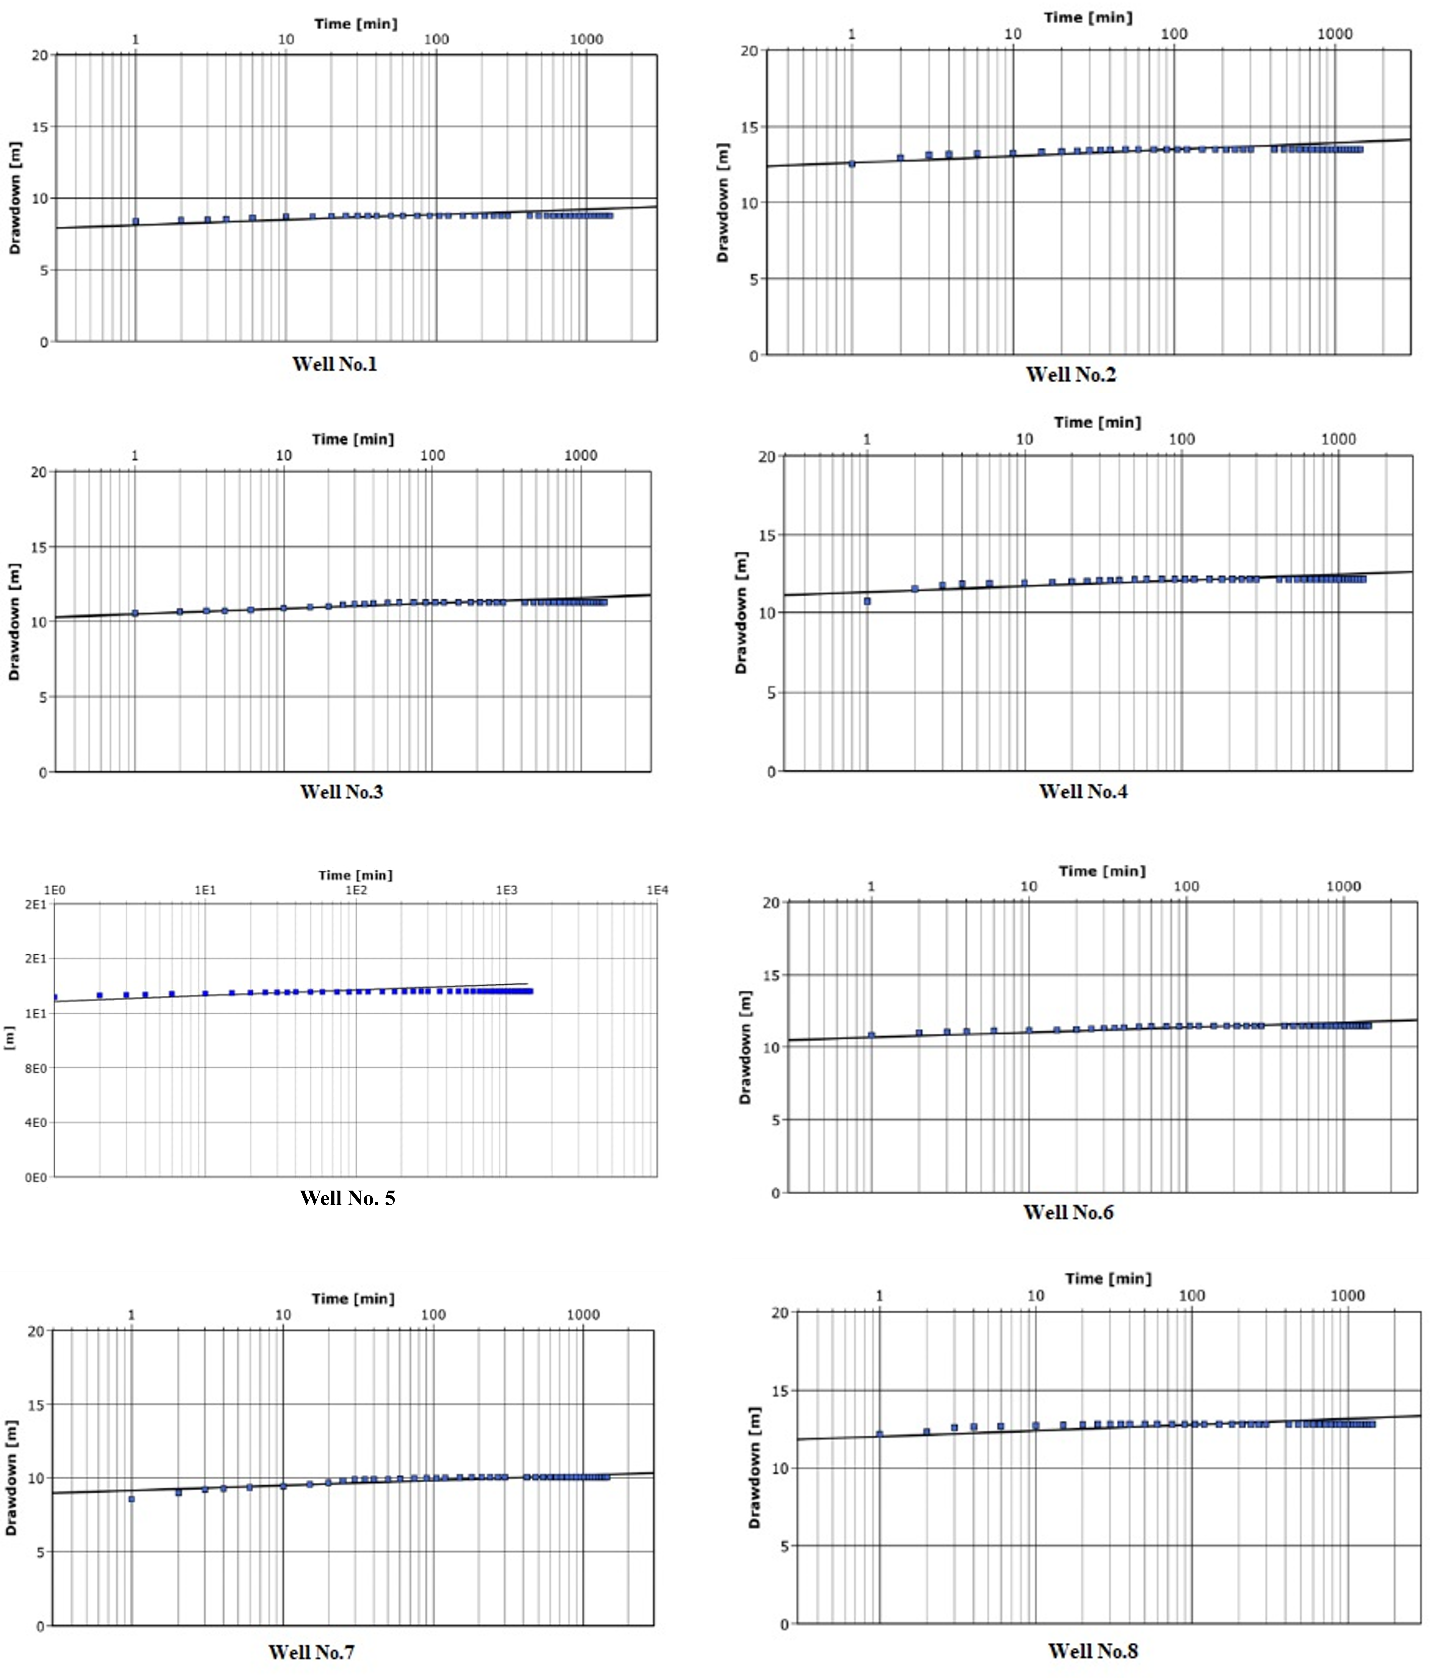
**

**Fig. 2S.** Long duration constant discharge pumping test at wells 1-8

**
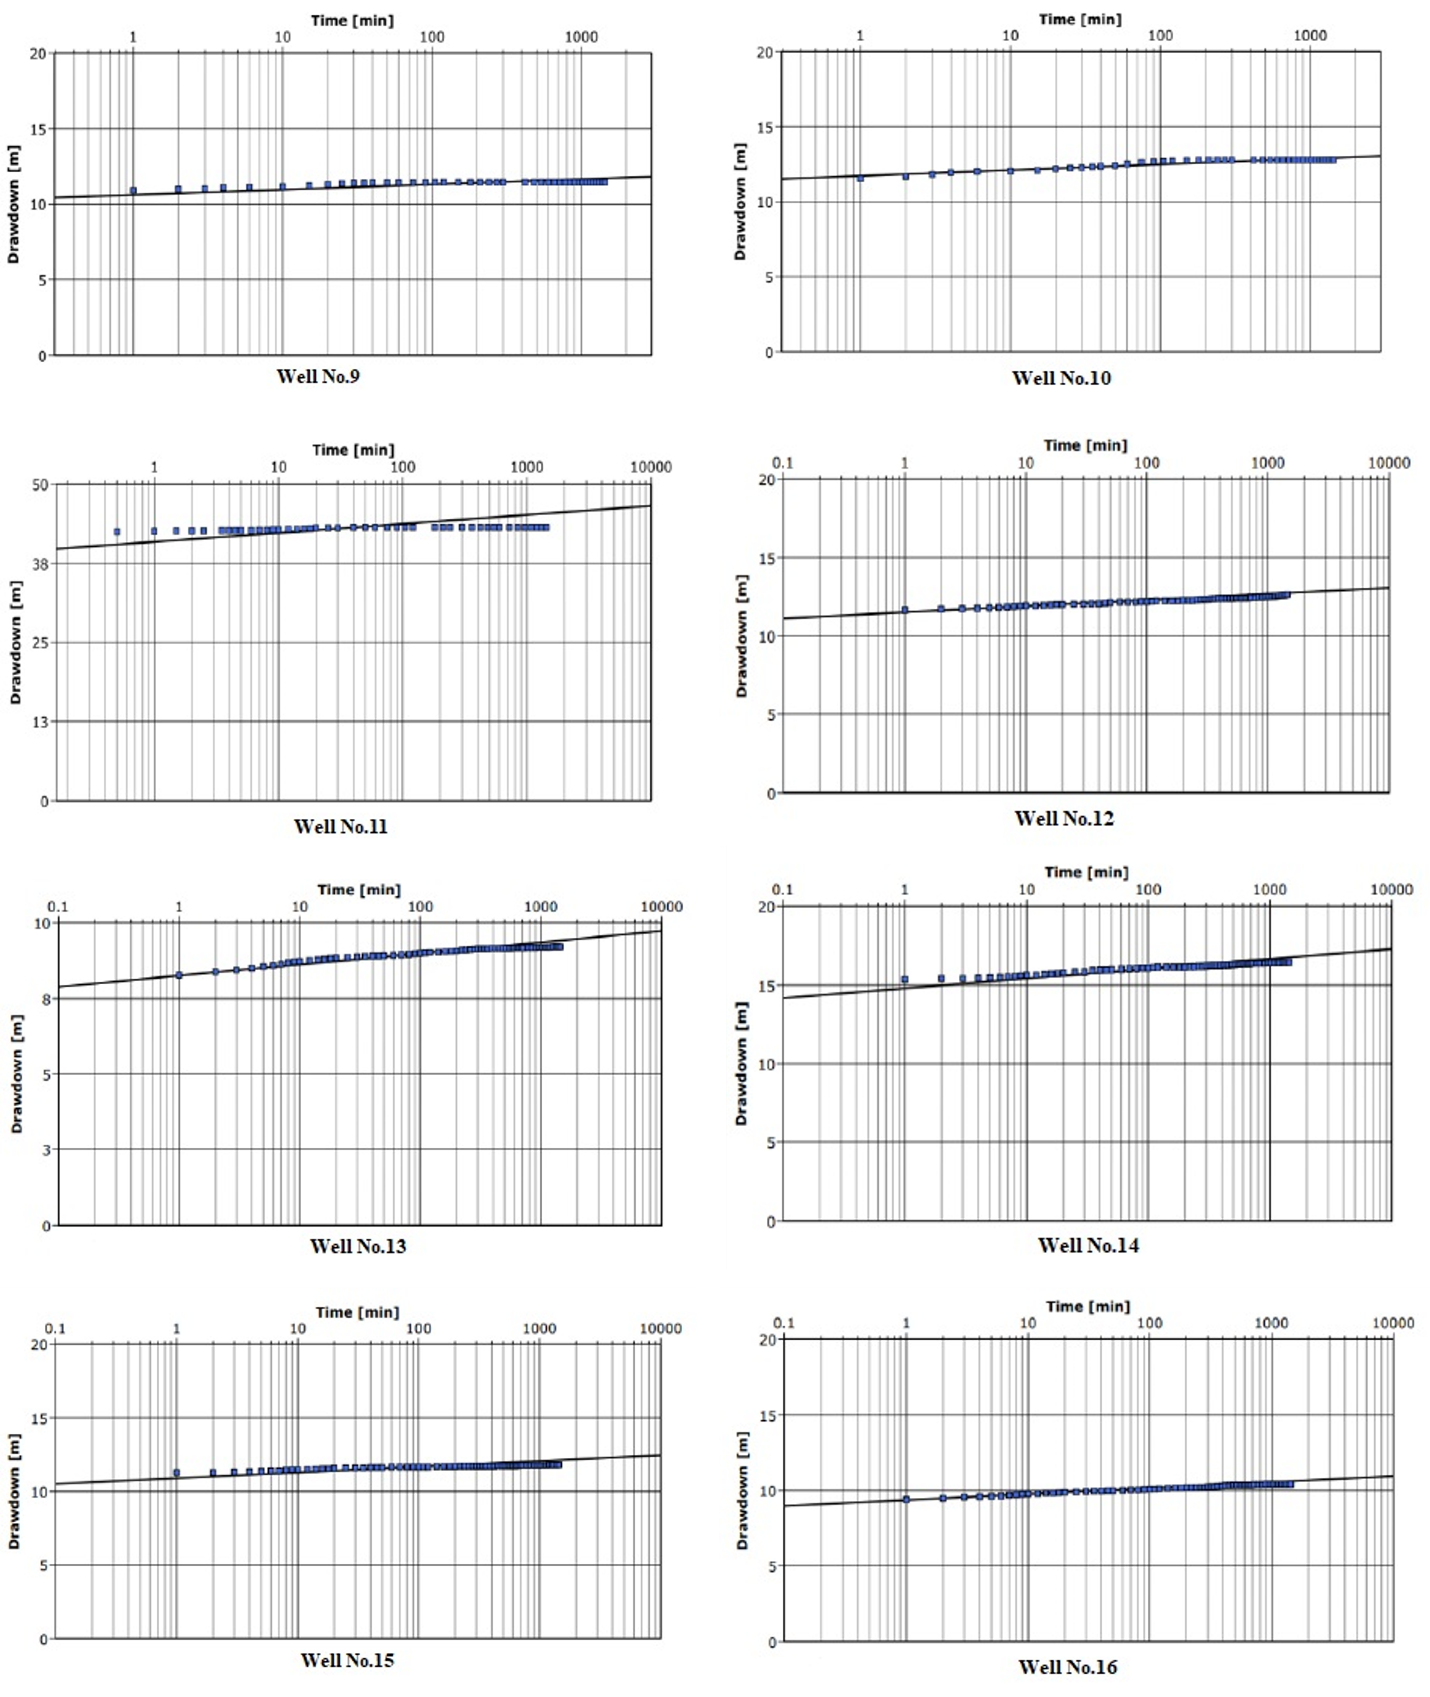
**

**Fig. 2S.** Continued: Long duration constant discharge pumping test at wells 9-16

**
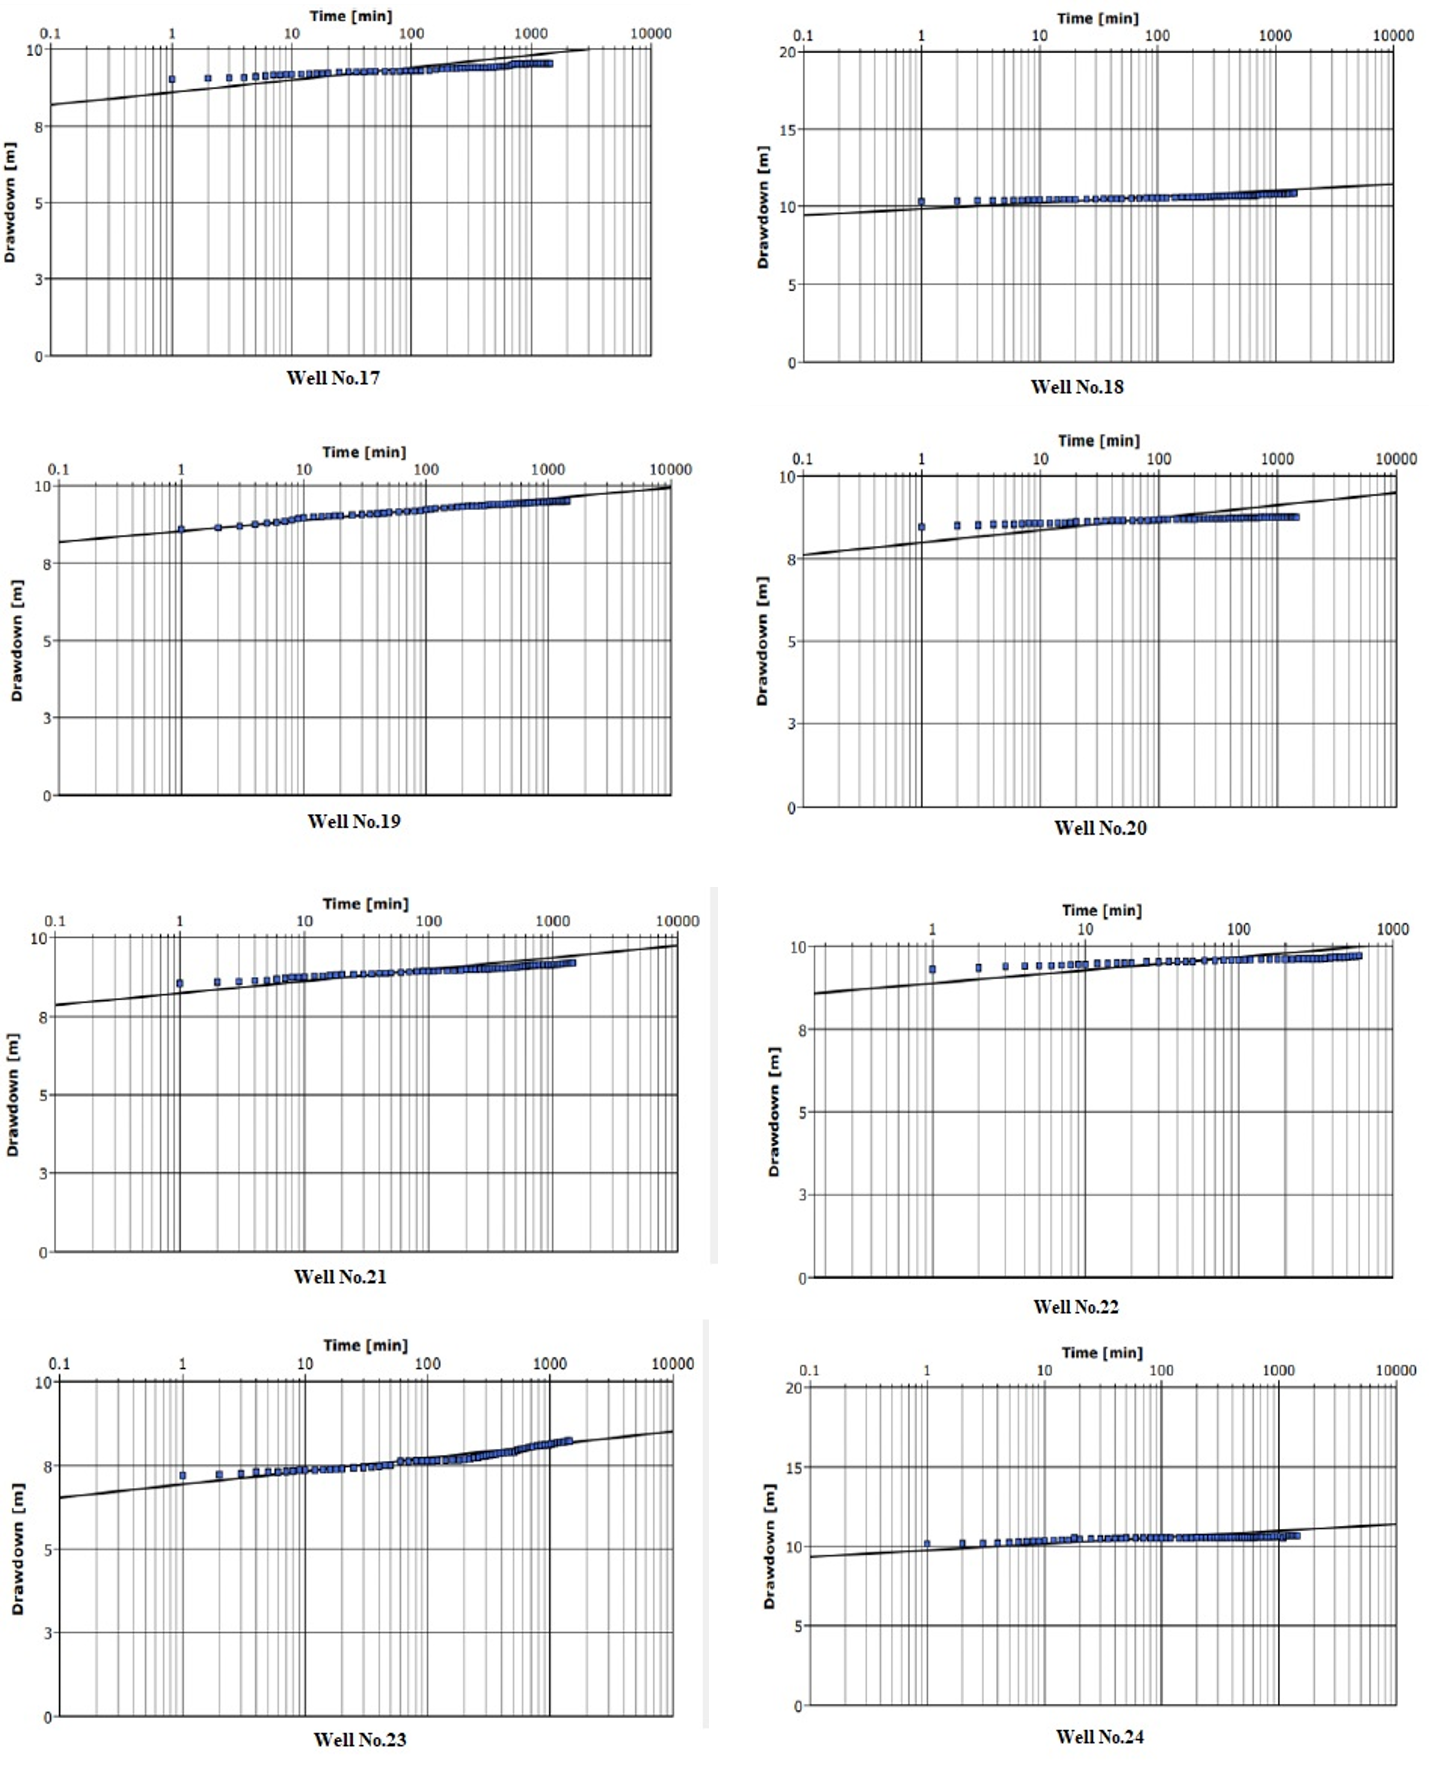
**

**Fig. 2S.** Continued: Long duration constant discharge pumping test at wells 17-24

**
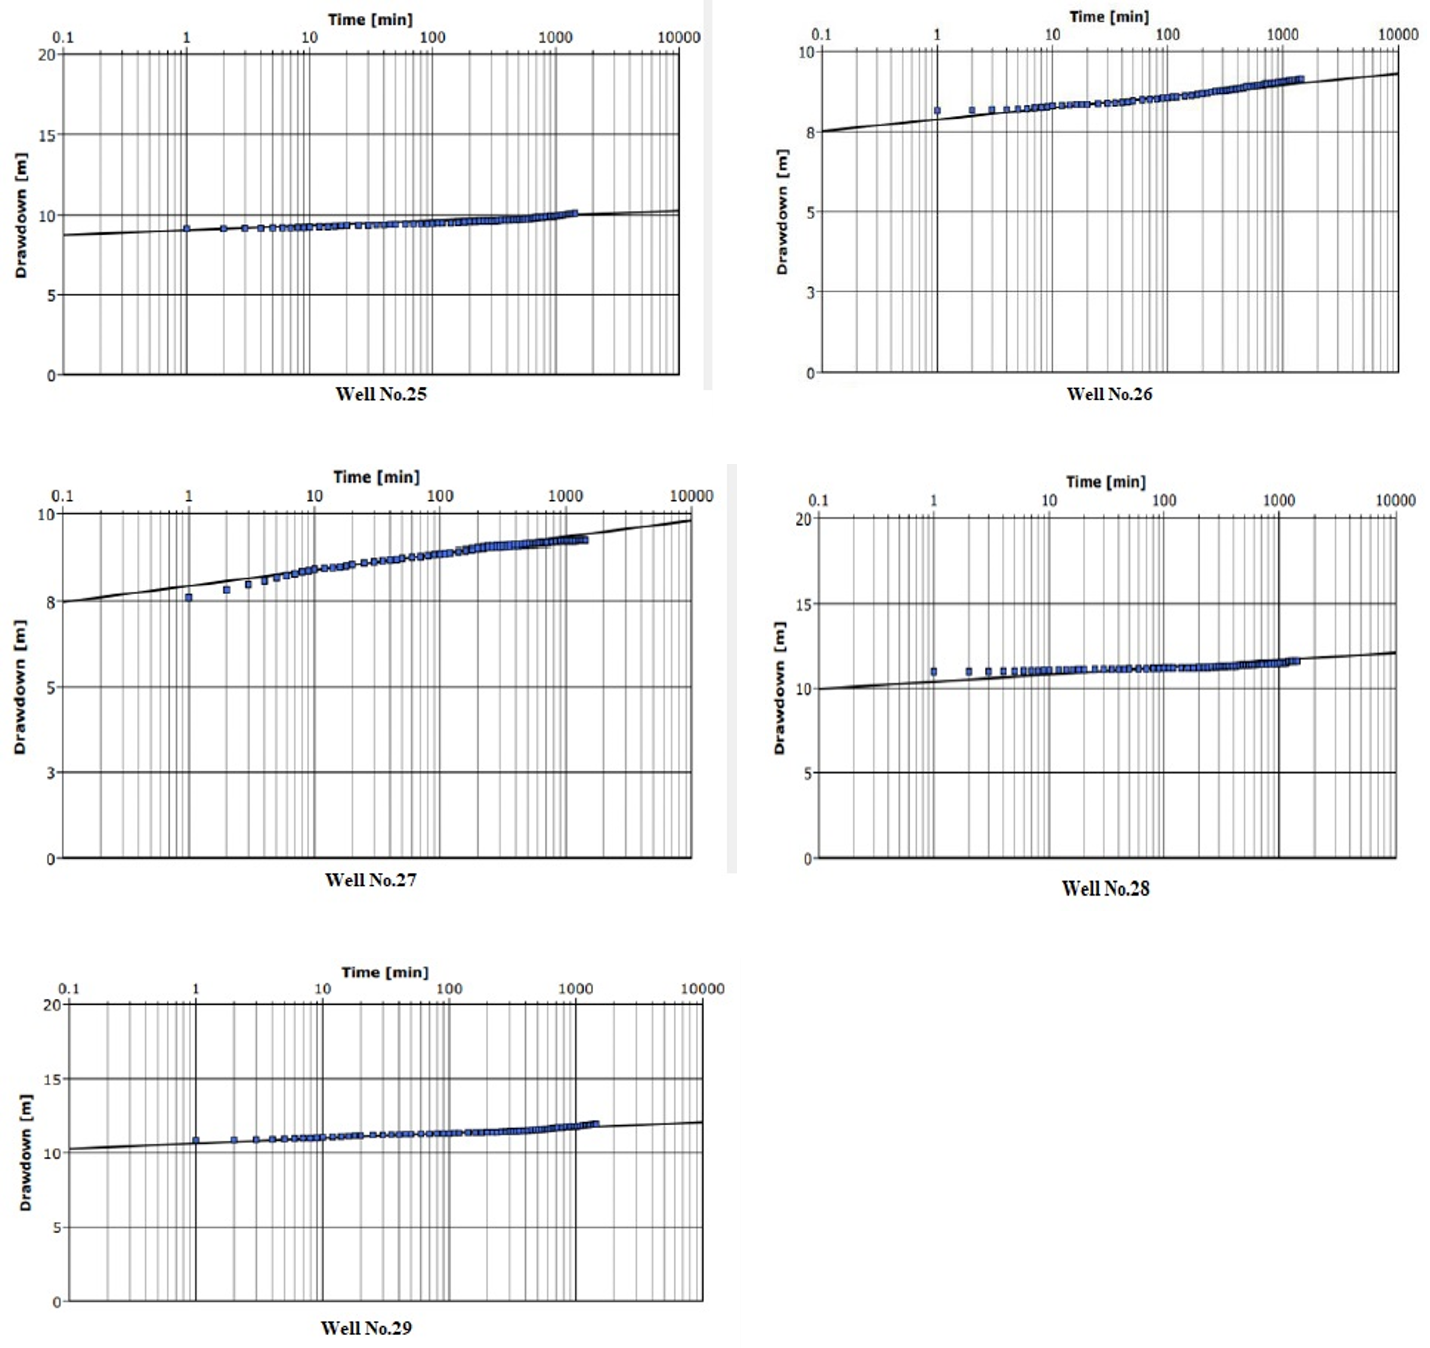
**

**Fig. 2S.** Continued: Long duration constant discharge pumping test at wells 25-29


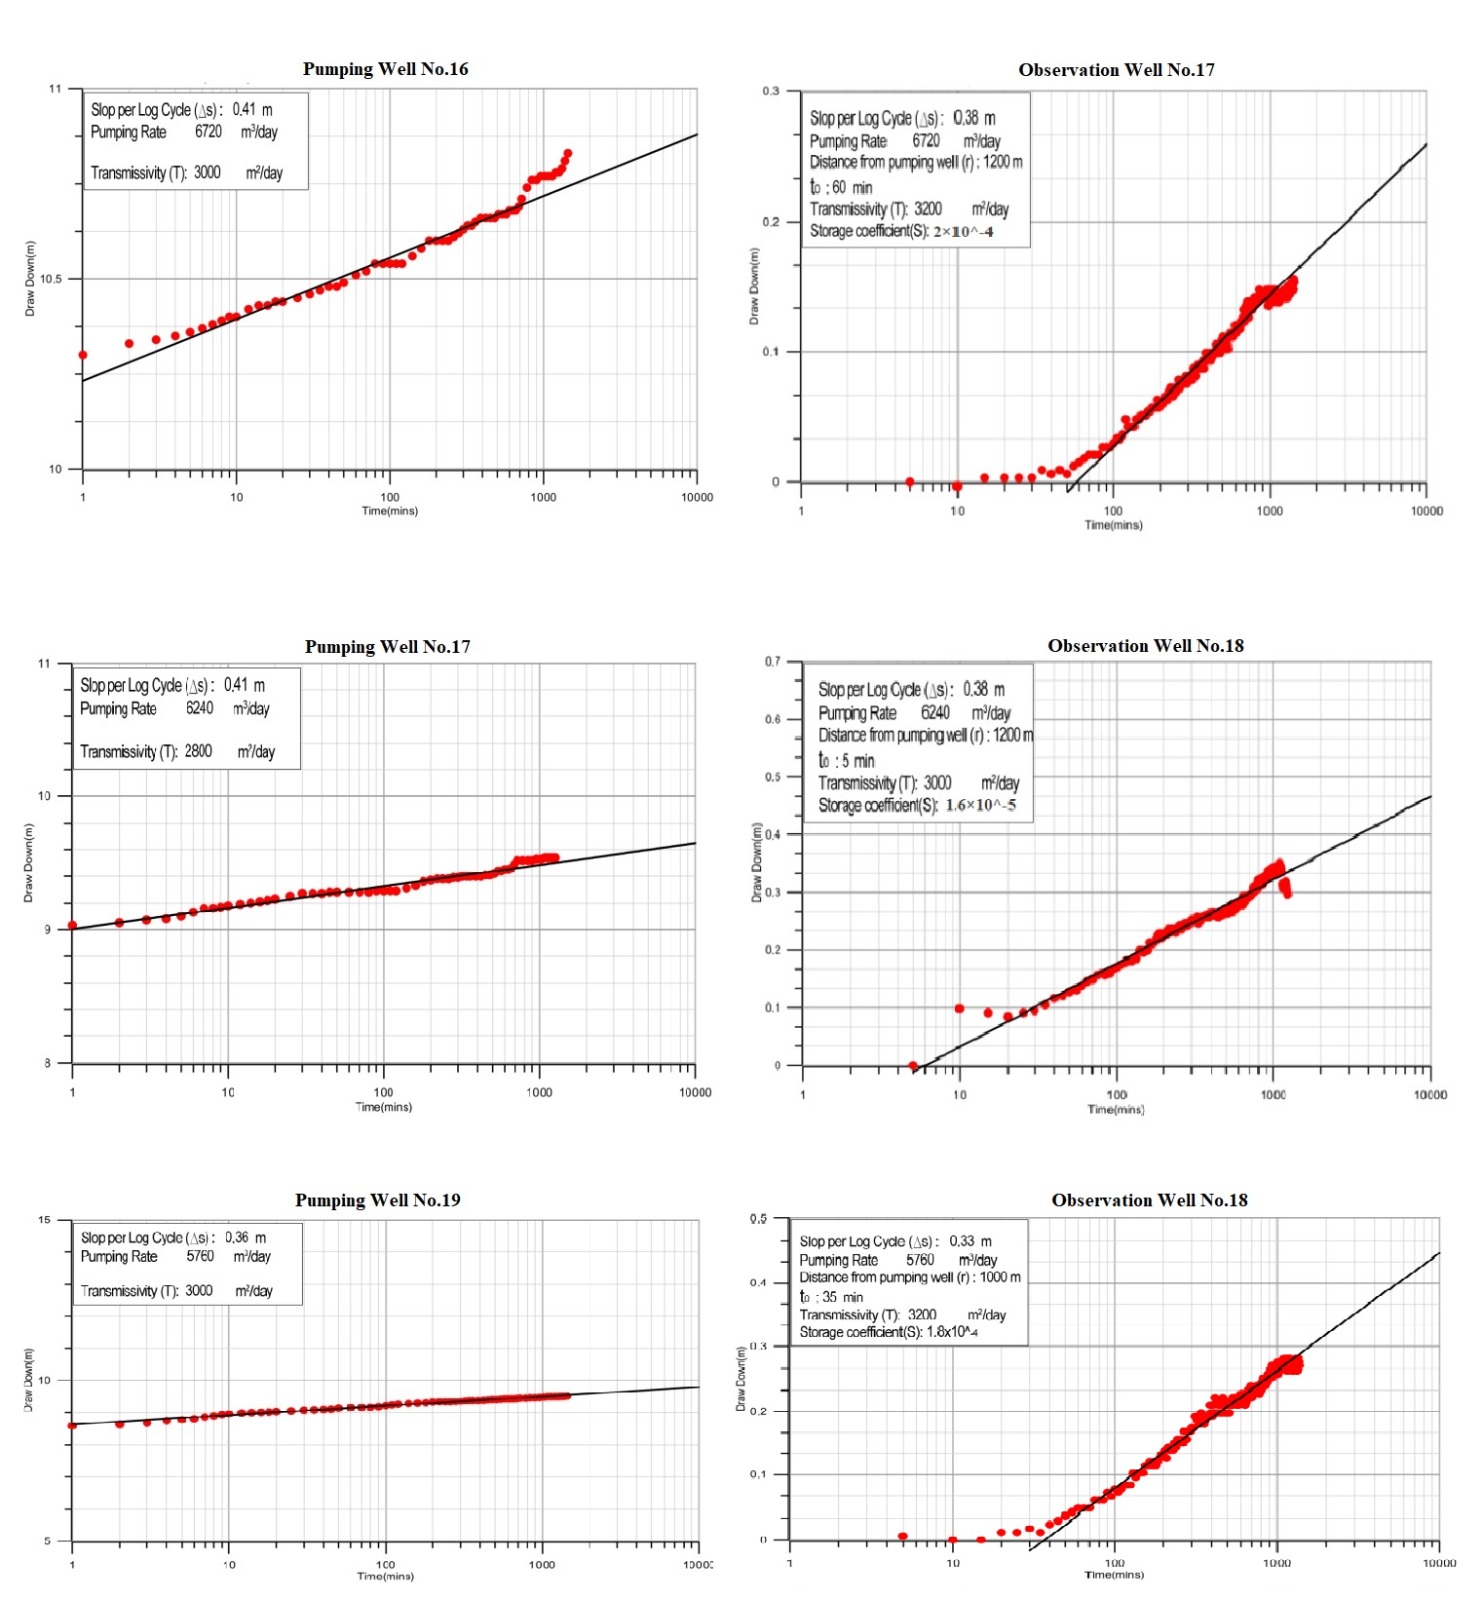


**Fig. 3S.** Long duration constant discharge pumping test by pumping (left) and observation wells (right) (see Table 6)


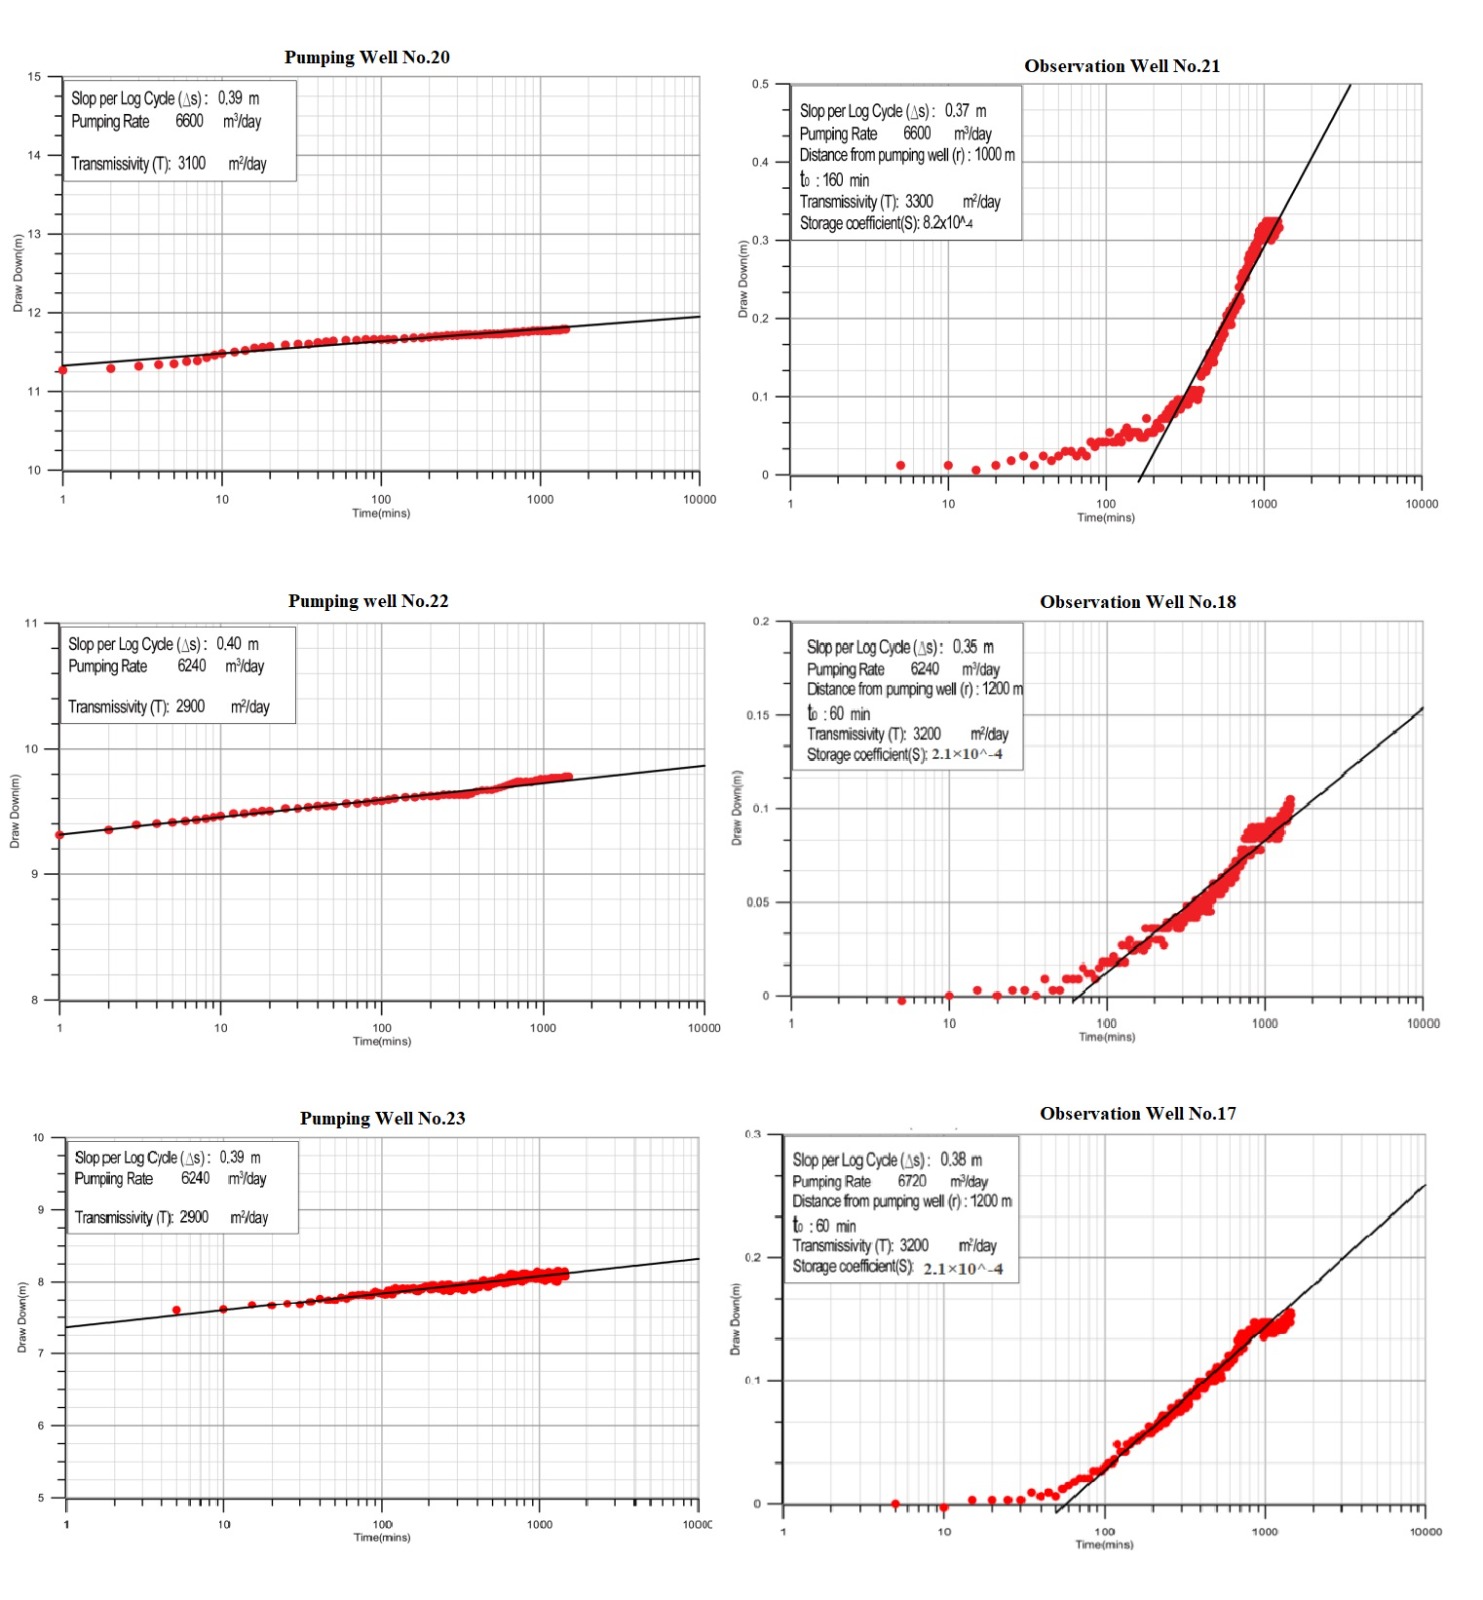


**Fig. 3S.**Continued: long duration constant discharge pumping test pumping (left) and observation wells (right) (see Table 6)


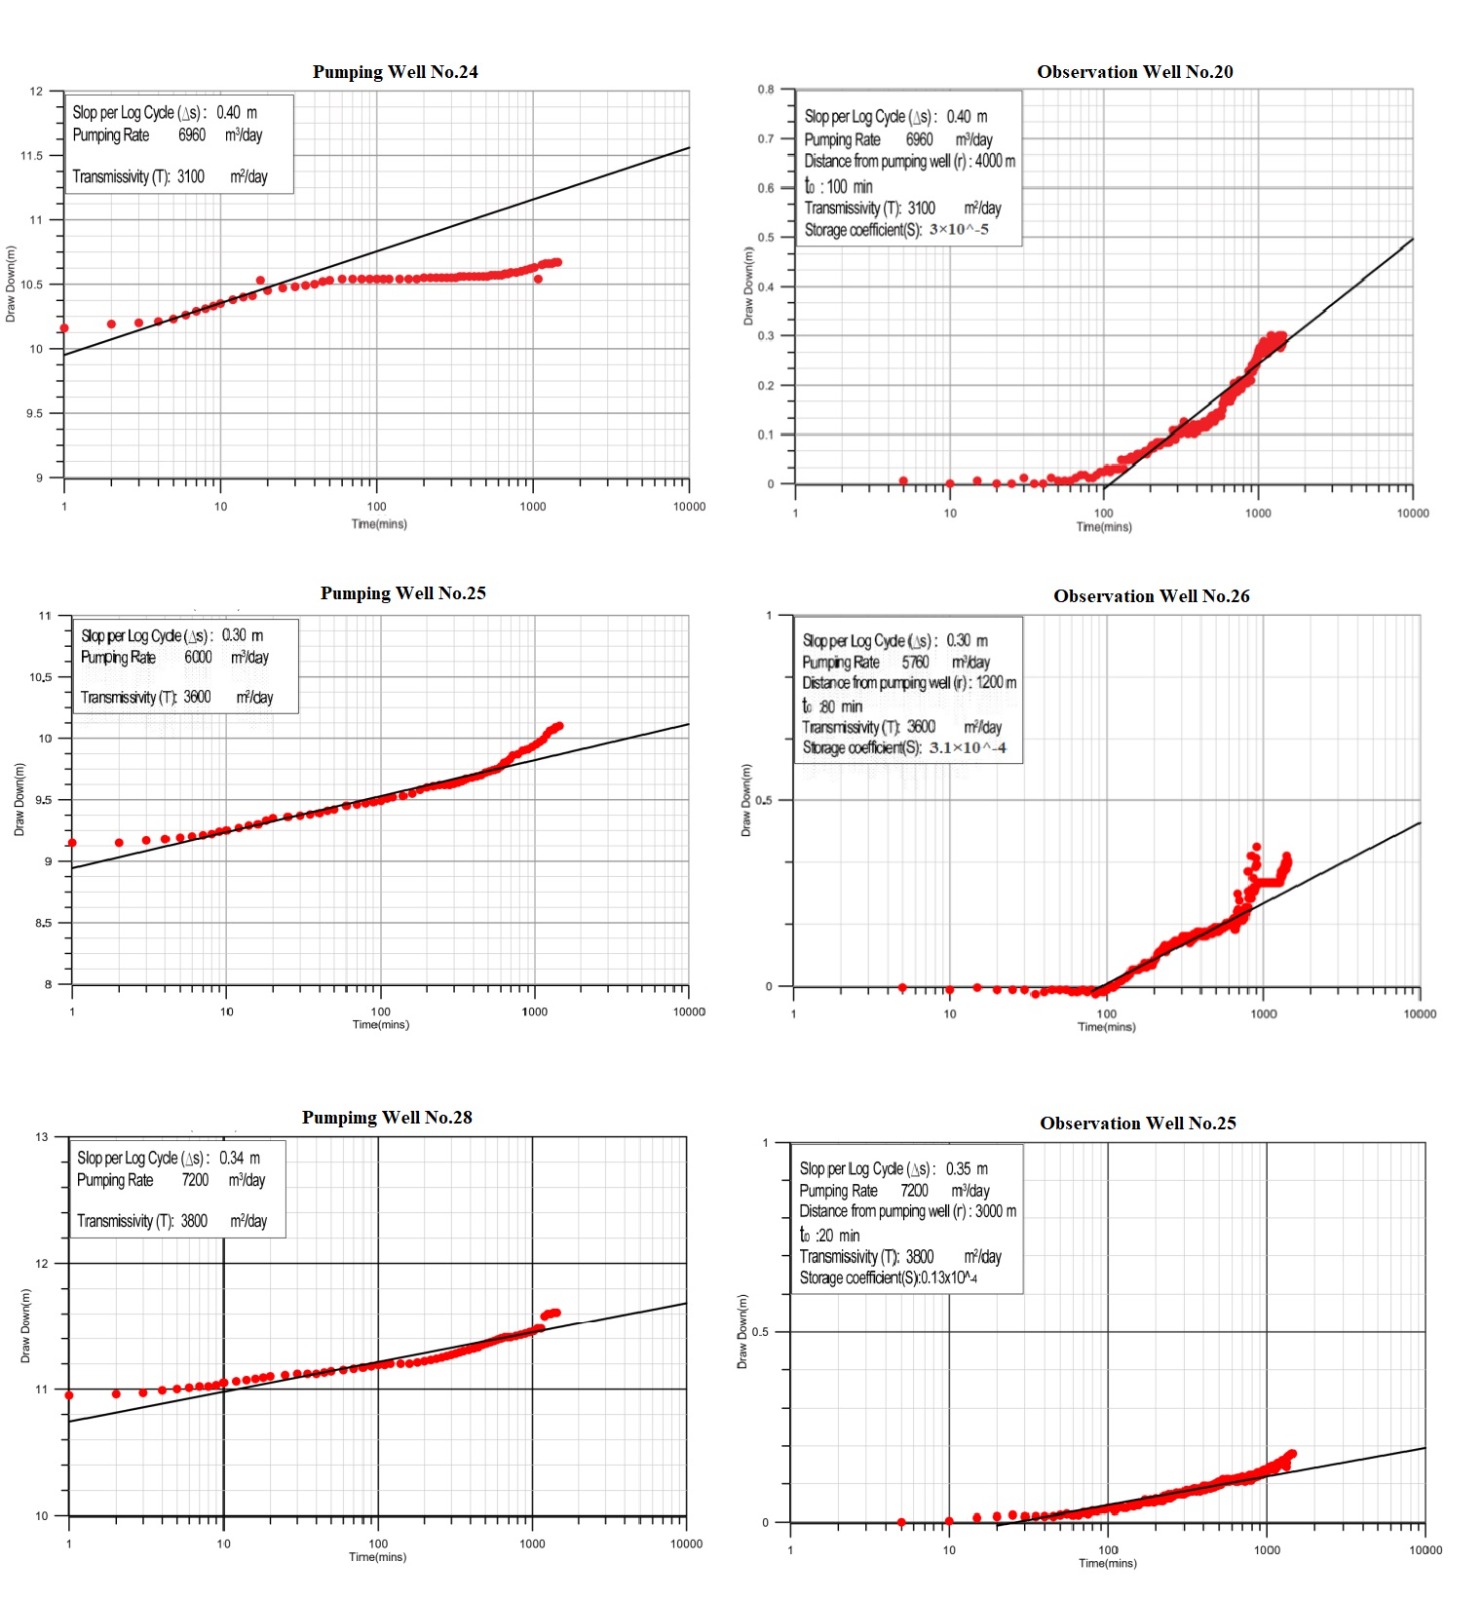


**Fig. 3S.**Continued: long duration constant discharge pumping test pumping (left) and observation wells (right) (see Table 6)
